# 1 **No maternal health without mental health: suggested** 2 **indicators to monitor perinatal mental health globally**

3  
4 Francesca Palestra<sup>1\*, #a</sup>, Allisyn C. Moran<sup>1, #a</sup>, Neerja Chowdhary<sup>2, #a</sup>, Tatiana Taylor Salisbury<sup>3</sup>, Tarun  
5 Dua<sup>2&, #a</sup>, Shanon McNab<sup>4&</sup>, Elly Layton<sup>5&</sup>, Elissa C Kennedy<sup>5&</sup>, Caroline SE Homer<sup>5&</sup>, Jane Fisher<sup>6&</sup>,  
6 Simone Honickman<sup>7&</sup>, Zelee Hill<sup>8&</sup>.

- 7  
8 1. Department of Maternal Newborn Child and Adolescent Health and Ageing (MCA), World  
9 Health Organization (WHO), Geneva, Switzerland  
10 2. Department of Mental Health, Brain Health and Substance Use (MSD), World Health  
11 Organization (WHO), Geneva, Switzerland  
12 3. Centre for Global Mental Health, King's College London, London, United Kingdom  
13  
14 4. MOMENTUM Country and Global Leadership, Jhpiego, Washington, District of Columbia,  
15 United States of America  
16 5. Burnet Institute, Australia  
17 6. Public Health and Preventive Medicine, Monash University, Melbourne Australia  
18  
19 7. Department of psychiatry and mental health, University of Cape Town, Cape Town, South Africa  
20 8. Institute for Global Health, University College London, London, United Kingdom

21  
22 #a current address: Avenue Appia, Geneva Switzerland

23 \*Corresponding author: Francesca Palestra, [fr.palestra@gmail.com](mailto:fr.palestra@gmail.com)

24 FP is the senior author who wrote and conceived the paper

25 AM, NC and TTS are joint senior authors and supported in the process and development of the paper

26 & contributed equally to this work.

## 27 **Abstract**

28 Perinatal mental health refers to the psychological wellbeing of women during pregnancy and up to one  
29 year postpartum. Perinatal mental health conditions as depression significantly affect maternal, newborn  
30 health, and child development worldwide. However, the absence of standardized indicators limits  
31 effective monitoring and evaluation. This paper introduces a framework with indicators for global  
32 perinatal mental health monitoring.

33 The framework development involved a scoping review, expert consultations, and stakeholder surveys. A  
34 global expert group, guided by evidence and the World Health Organization (WHO), identified an initial  
35 set of indicators. Two rounds of online surveys were conducted, allowing stakeholders to rank these  
36 indicators and suggest additional ones. Indicators were chosen based on their validity, reliability,  
37 relevance, feasibility, and potential impact for advocacy purposes on perinatal mental health. The WHO  
38 expert working group finalized the set of indicators.

39 Six perinatal mental health indicators were identified for future testing. These include three primary  
40 indicators: policy presence, screening coverage, and prevalence of perinatal mental health conditions.  
41 Three secondary indicators cover mental health expenditure, healthcare professional training, and  
42 provision of care.

43 Challenges to implementing standardized monitoring include resource limitations and data collection  
44 methods. Strengthening health workers and facility capacity to measure, report, and interpret perinatal  
45 mental health data, including the use of screening tools, is crucial. The integration of these indicators into  
46 existing systems, such as health information management systems (HIMS) and national surveys, will be  
47 key.

48 Monitoring perinatal mental health is essential for improving maternal and newborn outcomes. The  
49 proposed framework offers a means to enhance global monitoring and guide policy interventions. Global  
50 stakeholders are encouraged to integrate perinatal mental health into their policy, program, and  
51 monitoring agendas.

52

## 53 **Key words**

54 Perinatal mental health, maternal health, newborn health, depression, mental health conditions, health  
55 monitoring, indicators

56

## 57 **Introduction**

58 Perinatal mental health (PMH) is one of the most neglected issues in maternal health [1]. PMH refers to  
59 the psychological wellbeing of individuals during pregnancy and up to one year postpartum [2]. This is  
60 not to be confused with the perinatal period of a newborn which is seven days after birth [3].

61 A variety of mental health conditions may be experienced during the perinatal period, including but not  
62 limited to depression, anxiety, psychoses and alcohol and substance use [4, 5]. Perinatal mental health  
63 conditions pose a significant burden globally, affecting millions of women each year. Globally it is  
64 estimated that 10-20 % of pregnant women and those who just have given birth experience depression and  
65 rates are highest in low- and middle-income countries [8, 9], Different cultural practices, poverty, biological  
66 and social factors have been associated with influencing women's vulnerability to perinatal mental health  
67 conditions [10].

68 Poor PMH not only has adverse effects on the woman's quality of life but also impacts the health  
69 outcomes of newborns and children [11]. For example, perinatal depression has been linked to suicide and  
70 adverse birth outcomes, such as preterm birth and low birth weight, as well as long-term developmental  
71 and behavioral issues in children [12, 13]. Perinatal mental health is therefore crucial for the wellbeing of  
72 women and their babies.

73 Despite the prevalence and impact of perinatal mental health conditions, there is a lack of standardized  
74 indicators for global monitoring. No perinatal mental health indicators are currently tracked routinely  
75 across countries in health information management systems (HIMS) or through standardized national  
76 health surveys as Demographic and Health Surveys (DHS) or Multiple Indicator Cluster Surveys (MICS).

77 Existing indicators, mainly from high-income countries, vary widely between countries and regions,  
78 making it challenging to compare data and assess the effectiveness of interventions [14, 15, 16].

79 Moreover, many indicators focus predominantly on the diagnosis and treatment of perinatal mental health  
80 conditions (mainly postpartum depression) rather than on the services provided and the access of women  
81 to those services, ensuring preventive measures and appropriate referral. There is also a need for more

82 comprehensive and integrated approaches to perinatal mental health monitoring that address the  
83 complexity of healthcare systems and policies across countries ensuring integration across levels of care  
84 and within maternal, newborn and child health services [17]. Standardized indicators are essential for  
85 assessing the burden of perinatal mental health conditions globally and should show progress to address  
86 perinatal mental health issues, as well as guide policy and resource allocation.

87

## 88 **Overview of the Global PMH Theory of Change and scoping review on PMH** 89 **indicators**

90 A Global PMH Theory of Change (ToC) was published in 2022 [18] providing a strategic roadmap for  
91 developing standardized indicators for perinatal mental health monitoring. It outlines the underlying  
92 assumptions and pathways through which the proposed indicators are expected to bring about positive  
93 changes in the monitoring and management of perinatal mental health conditions. By identifying key  
94 inputs, activities, outputs, outcomes, and impacts, the ToC serves as a guide for understanding how the  
95 proposed indicators can contribute to improved maternal and newborn health outcomes. The ToC is based  
96 on a social ecological model where its domains are in order: individual, interpersonal relationship,  
97 community, service delivery ecosystem and policy landscape.

98 Further a scoping review conducted in 2023 aimed to identify existing perinatal mental health indicators  
99 used in monitoring systems worldwide [17]. The search in the scoping review was conducted in accordance  
100 with the Preferred Reporting Items for Systematic Reviews and Meta-Analyses Extension for Scoping  
101 Reviews. After consultation with WHO it was decided to exclude indicators related to risk factors for PMH  
102 or did not measure PMH directly. Additional indicators which measured mental health but were not specific  
103 to the perinatal period were excluded, as these are well described in WHO Mental Health Atlas [19]. Results  
104 were compiled and mapped to the relevant level in the Global PMH ToC. The review considered the  
105 indicators which: (1) aligned with the Global PMH ToC and landscape analysis definition of perinatal

106 mental health (during pregnancy and up to one year after childbirth); (2) had a definition, including how it  
107 could be measured; and (3) was published from 1 January 2000 to 6 September 2023.

108 Nine indicators were identified which addressed individual (six indicators) and service-level (three  
109 indicators) characteristics (**Table 1**). In order to be reflective of global differences in the feasibility and  
110 availability of data to determine if indicators are met, stakeholder engagement in determining a final set  
111 of indicators is needed.

112 **Table 1. List of PMH indicators identified in the scoping review**

| Theory of change domain    | Indicator                                                                                |
|----------------------------|------------------------------------------------------------------------------------------|
| Individual                 | 1. Proportion of women with postpartum depression                                        |
| Individual                 | 2. Proportion of women with depression in perinatal period                               |
| Individual                 | 3. Proportion of women with postpartum psychosis                                         |
| Individual                 | 4. Proportion of women with adjustment and distress in perinatal period                  |
| Individual                 | 5. Proportion of women with PTSD in perinatal period                                     |
| Individual                 | 6. Proportion of women with mental health conditions in perinatal period                 |
| Service delivery ecosystem | 7. Proportion of women screened for mental health conditions in perinatal period         |
| Service delivery ecosystem | 8. Proportion of women with access to mental health services during the perinatal period |

Service delivery ecosystem

9. Proportion of healthcare providers trained to provide mental healthcare in perinatal period

113

114

115 The purpose of this paper is to present the process for developing a set of primary and secondary  
 116 indicators for countries in monitor PMH, discuss challenges in implementation of screening methods and  
 117 training providers, and provide policy recommendations for integrating perinatal mental health indicators  
 118 into existing monitoring frameworks.

## 119 **Methods**

120 The development of a set of indicators for perinatal mental health involved a multi-stage process to ensure  
 121 robustness and inclusivity of all World Health Organization (WHO) regions. This was a four-phase  
 122 process (**Table 2**) guided by a WHO working group of experts and included online surveys based on the  
 123 identified indicators of the scoping review and in consultation with the WHO Mother and Newborn  
 124 Information for Tracking Outcomes and Results (MoNITOR) advisory group. This process brought to the  
 125 finalization of global indicators on PMH with primary and secondary indicators for further reflection and  
 126 adjustment.

127 **Table 2. Phases to develop global PMH indicators**

| Phase 1                                                                                                            | Phase 2                                               | Phase 3:                                                                                                                             | Phase 4:                                                                                                                          |
|--------------------------------------------------------------------------------------------------------------------|-------------------------------------------------------|--------------------------------------------------------------------------------------------------------------------------------------|-----------------------------------------------------------------------------------------------------------------------------------|
| Establishment of WHO experts group on PMH monitoring and discussion on identified indicators of the scoping review | First survey with WHO experts group on PMH monitoring | Second survey with WHO experts group on PMH monitoring and additional suggested stakeholders from global, regional and country level | Consultation with WHO experts group on PMH monitoring and the WHO MoNITOR advisory group and development of global PMH indicators |

128

129

130 In phase one, a WHO working group of experts, comprised of 21 experts in perinatal mental health and  
131 monitoring and evaluation, from diverse regional backgrounds, was convened to provide guidance on  
132 indicator selection. The role of the WHO working group included providing feedback on the scoping  
133 review, on the list of proposed indicators and relevance in relation to the ToC; feedback and review on the  
134 findings from surveys, and of the proposed indicators, including feasibility of implementation.

135 In phases two and three, two rounds of surveys were conducted through an anonymized online form,  
136 among an international group of stakeholders, including healthcare professionals, researchers,  
137 policymakers, and representatives from civil society organizations. In phase two with the first survey,  
138 respondents were asked to select the top three PMH indicators for global monitoring from the list of nine  
139 indicators identified through the previous scoping review [17] and to propose any additional indicators  
140 used at the country-level which may be useful for global monitoring. During phase three the second  
141 survey included a wider group of stakeholders invited to order the list of indicators, selected from the  
142 previous survey, from the most to the least important indicator; and to propose additional ones if relevant.  
143 After each round of survey, the WHO working group of experts had online consultations to provide  
144 feedback on the findings. The specific questions of the two surveys are reported in **S1 First and second**  
145 **surveys**.

146

147 The first survey was completed by 21 members of the WHO working group, resulting in a total of 17  
148 answers out of 21 participants. The second survey was completed by 35 stakeholders part of a broader  
149 group of experts involved more generally in maternal, newborn, child and adolescent health program  
150 implementation, mental health programme and monitoring and evaluation from global, regional and  
151 country levels. These stakeholders were identified through WHO regional offices and by the members of  
152 the WHO expert committee. The second survey requested participants to In the second survey the first  
153 question collected a total of 17 answers, while the second questions collected 8 answers.

154 Phase four included consultation with the WHO experts group on PMH monitoring and the WHO  
155 MoNITOR advisory group and development of global PMH indicators. Firstly, the feedback obtained  
156 from these surveys was analysed and a list of proposed indicators was developed to ensure their relevance  
157 and applicability across different settings. Later on, the WHO Mother and Newborn Information for  
158 Tracking Outcomes and Results (MoNITOR) advisory group and the WHO experts group on PMH  
159 monitoring, shared overall guidance and inputs on the results collected from the two surveys, which  
160 further informed the development process.

161 Inclusion and exclusion criteria were established to ensure the selection of indicators that met predefined  
162 quality standards and objectives. Indicators were included if they demonstrated validity, reliability,  
163 feasibility and potential impact for advocacy purposes. They also needed to be relevant to the assessment  
164 of perinatal mental health conditions and be able to measure progress towards improving maternal and  
165 newborn health outcomes for global monitoring purposes. Indicators were excluded if they lacked  
166 empirical evidence, were risk-related to develop PMH conditions or were overly complex or resource-  
167 intensive or were specific to a particular context and not generalizable to a broader population.

168

169 This work is based on the review of the literature and expert opinion, including WHO's technical  
170 advisory groups on monitoring and measurement, and it is not original research. Therefore, we did not  
171 seek approval from the WHO ERC for ethical clearance.

172 We obtained written consent from members of the WHO expert group, following WHO protocols for  
173 expert group participation, which include declarations of interest and confidentiality agreements. The  
174 consent forms are securely stored on WHO servers, protected by a password. The WHO expert group has  
175 been involved in this activity on the prioritization of the PMH indicators from the 8th of December 2023  
176 until the 25th of April 2024.

177

## 178 **Results**



179 A summary of all steps in the selection of the indicators and results on the identification and prioritization  
180 of indicators can be found in **S2 Table**.

## 181 **Results from phase two (first survey)**

182 A total of 17 out of 21 WHO Working Group members selected the top three PMH indicators for global  
183 monitoring choosing from the nine indicators identified through the previous scoping review [17] (**Table**  
184 **3**).

185 **Table 3. The PMH indicators for global monitoring in order of relevance by stakeholders from the**  
186 **first survey**

| <b>Theory of change domain</b> | <b>Indicator</b>                                                                               | <b>Score</b> |
|--------------------------------|------------------------------------------------------------------------------------------------|--------------|
| Service delivery ecosystem     | 7. Proportion of women screened for mental health conditions in perinatal period               | 12 (70%)     |
| Service delivery ecosystem     | 8. Proportion of women with access to mental health services during the perinatal period       | 12 (70%)     |
| Service delivery ecosystem     | 9. Proportion of healthcare providers trained to provide mental healthcare in perinatal period | 11 (64%)     |

187  
188 Additionally, three more indicators have been suggested to be important for inclusion (although not  
189 classified as top three) which are at individual level: 2. “Proportion of women with depression in perinatal  
190 period”; 6. “Proportion of women with mental health conditions in perinatal period” and 1. “Proportion of  
191 women with postpartum depression”.

192 Nine respondents proposed additional indicators used at the country-level potentially useful for global  
193 monitoring:

- 194 • Postnatal care (PNC) disaggregated for women and baby

- 195 • Early Childhood Development Index (ECDI)
- 196 • System readiness indicators: 1. Presence of content on screening and counseling for maternal
- 197 mental health in relevant pre-service curricula (MCH nurses; Community Health Workers etc.); 2.
- 198 Antenatal care (ANC) and postnatal care (PNC) consultation /home visit guidelines including
- 199 PMH screening, counseling & follow up
- 200 • Availability of PMH policy or included in national mental health policy
- 201 • PMH included in WHO country annual work plan
- 202 • PMH included in national health policy and other documents
- 203 • Proportion of health budget (mental health budget) allocated to maternal mental health (I have not
- 204 used, but would be a useful indicator of high-level commitment at governance level)

205

## 206 **Results from phase three (second survey)**

207 The survey requested 35 participants to put in order from the most important to the least the priority PMH  
208 indicators for global monitoring identified in the previous survey by the WHO working group of experts  
209 and to propose any additional indicator.

210 17 stakeholders completed the survey and the most voted indicators have been listed in order of priority:

- 211 1. Proportion of women with access to mental health services during the perinatal period;
- 212 2. Proportion of women screened for mental health conditions in perinatal period
- 213 3. Proportion of healthcare providers trained to provide mental healthcare in perinatal period;
- 214 4. Proportion of women with mental health conditions in perinatal period;
- 215 5. Proportion of women with depression in perinatal period
- 216 6. Proportion of women with postpartum depression

217 Additionally, eight respondents suggested the inclusion of additional indicators such as:

- 218 • Proportion of women with perinatal mental condition linked to psychosocial support OR mental
- 219 health services

- 220 • Proportion of health budget allocated to perinatal mental health
- 221 • The proportion of women attending a first referral appointment for treatment of a mental health
- 222 condition
- 223 • Women with anxiety during perinatal period and additional risk-related indicators for PMH

224

## 225 **Results from phase four**

### 226 **Results consultations with WHO expert committee**

227 Following analysis of both surveys results, the key recommendations by the WHO expert committee were  
228 on the identification and prioritisation of indicators and on feasibility and implementation. These two  
229 aspects will be described separately.

#### 230 *Identification and prioritisation of indicators*

231 There was consensus from the WHO expert group to include the list of indicators below based on  
232 prioritisation from stakeholders and likely feasibility:

- 233 • To include indicators number 1. “Proportion of women with postpartum depression” and 2.  
234 “Proportion of women with depression in perinatal period” , which are important although may  
235 be difficult to measure initially.
- 236 • To include indicator 6. “Proportion of women with mental health conditions in perinatal period”,  
237 and to better describe the common mental health conditions in the metadata.
- 238 • The committee also discussed the inclusion of indicator 7. “Proportion of women screened for  
239 mental health conditions in perinatal period” versus the possible inclusion of an indicator which  
240 measured the number of consultations on PMH through ANC and PNC services. It was decided to  
241 include indicator 7 since will already provide more specific information with the use of validated  
242 screening tools. Further, the WHO recommendations on maternal and newborn care for a positive  
243 postnatal experience currently include PMH services for PNC [20] but not for ANC [21],  
244 therefore different countries could have a different approach in providing PMH services.

- 245       • To include indicator 9. “Proportion of healthcare providers trained to provide mental healthcare in  
246       perinatal period”.

247   Then a list the indicators that were excluded (and rationale):

- 248       • To exclude indicator 8. “Proportion of women with access to mental health services during the  
249       perinatal period”. This indicator was excluded because of the unclear definition of “access”, and  
250       reliable measurement at a national level was considered less feasible.

- 251       • To exclude an indicator which measures anxiety during pregnancy although this can contribute to  
252       postpartum depression. The expert group acknowledged anxiety as an important issue in PMH  
253       and a precursor to and as a risk factor for depression. Since we were specifically excluding  
254       indicators of risk factors, this indicator has been excluded.

255

256   Additional new indicators that were added:

- 257       • The WHO expert committee recognized the importance of having two indicators for advocacy  
258       purposes on budget allocation and on existing national policies for PMH. If countries are unable  
259       to identify the budget specifically for PMH, the budget allocated to mental health may be reported  
260       instead

- 261       • To group some indicators as health system indicators: budget, trained staff, etc... Suggested  
262       grouping indicators by primary indicators to monitor from the start and additional secondary  
263       indicators to monitor within a later timeframe.

264   *Feasibility and implementation*

- 265       • To include the data source for each indicator to assist with prioritization. It was agreed to focus  
266       on a few indicators, define their purpose, and use them to advocate for services. It was recognised  
267       that PMH services may not be well defined, or even existent in many countries.

- 268
- To include recommendations consistently on screening tools to use for data collection, and where
- 269 to locate resources and services at national level. Although screening is not universal, each
- 270 country should have adopted a specific tool at national level.

271

## 272 **Results from consultation with WHO MoNITOR advisory group**

273 The consultation with WHO MoNITOR advisory group was focused on the feasibility and

274 implementation of the global PMH indicators. They identified the need to refine the indicators related to

275 perinatal mental health services, as well as the training and competencies required by healthcare providers

276 in order to offer mental healthcare services during the perinatal period. It was also deemed essential to

277 identify the specific mental health conditions that need to be measured and provide clear definitions for

278 these conditions. Additionally, there should be a specification of the screening tools approved by WHO,

279 along with the appropriate timeframe for their use. Clarification is needed on how and where to measure

280 these indicators, along with considerations for ethical practices in the measurement process. The inclusion

281 of referral processes and psychosocial support within the mental health services needs to be detailed. It is

282 important to harmonize WHO guidelines by including perinatal mental health recommendations in

283 guidelines on childbirth and antenatal care.

284 Given the variety of information to be collected and possible weaknesses in routine data collection

285 systems, indicators could be collected by different sources. Some of the indicators could be integrated

286 into HIMS or collected through national reporting (e.g. for indicators concerning existence of a national

287 PMH policy, government expenditure, health providers trained), while others may be more reliably

288 collected through national surveys like DHS or MICS or mental health surveys (e.g. indicators on

289 population prevalence of perinatal depression).

290 There should be a clear outline of the key elements required in a national plan for perinatal mental health,

291 such as the tools to use, the planning period, training, and the types of services available. The risk of

292 underreporting must be acknowledged. The indicator on the proportion of women with postpartum

293 depression should be retained, as postpartum conditions are among the most frequently diagnosed.  
 294 Finally, there should be specific screening for perinatal mental health conditions for women staying in the  
 295 hospital for their small and sick newborns in NICUs.

296

## 297 **Indicators for perinatal mental health monitoring**

298 Based on the consultations a list of primary indicators and a list of secondary indicators was created based  
 299 on capacity or quality data available (**Table 4** and **Table 5**). Metadata providing more detailed  
 300 descriptions of each indicator is available in **S3 File**.

301 **Table 4. Primary indicators for global monitoring**

| Monitoring domain | Indicator                                                                                                                         | Numerator                                                                                                                               | Denominator                                                     | Current preferred data source      | Other data sources |
|-------------------|-----------------------------------------------------------------------------------------------------------------------------------|-----------------------------------------------------------------------------------------------------------------------------------------|-----------------------------------------------------------------|------------------------------------|--------------------|
| Output            | Proportion of countries with national policy /plan for perinatal mental health in SRMNCAH or in the mental health policy/strategy | Number of countries with national policy for perinatal mental health in SRMNCAH policy/strategy or in the mental health policy/strategy | Total number of countries                                       | Policy review or WHO Policy survey |                    |
| Outcome           | Proportion of women screened for mental health conditions in perinatal period <sup>1</sup>                                        | Number of women who were screened for mental health conditions in in perinatal period <sup>1</sup>                                      | Total number of women who gave birth within a given time period | Household surveys                  | RHIS               |
|                   | Proportion of women with depression in perinatal period <sup>1</sup>                                                              | Number of women identified with depression <sup>2</sup> in the perinatal period <sup>1</sup>                                            | Total number of women who gave birth within a given time period | Household survey                   | RHIS               |

302

303 **Table 5. Secondary indicators for global monitoring**

| Monitoring domain | Indicator                                                                                                                     | Numerator                                                                                                       | Denominator                                                                             | Current preferred data source | Other data sources |
|-------------------|-------------------------------------------------------------------------------------------------------------------------------|-----------------------------------------------------------------------------------------------------------------|-----------------------------------------------------------------------------------------|-------------------------------|--------------------|
| Output            | Proportion of government allocated expenditure to perinatal mental health                                                     | Total government allocated expenditure to perinatal mental health                                               | Total government allocated expenditure on health <sup>3</sup>                           |                               |                    |
|                   | Proportion of in-service health care providers trained to provide mental healthcare services <sup>4</sup> in perinatal period | Number of in-service health care providers trained to provide mental healthcare services in perinatal period    | Total number of in-service health care providers providing services in perinatal period | Health facility assessment    | NHAs               |
| Outcome           | Proportion of women with perinatal mental health condition linked to psychosocial support OR mental health services           | Number of women with perinatal mental health condition linked to psychosocial support OR mental health services | Total number of women with perinatal mental health condition                            | Household survey              | RHIS               |

304

305 1 Perinatal period: during pregnancy and up to 1 year after pregnancy

306 2 Depression following consultation and use of available screening tool

307 3 Relatively crude indicator

308 4 Mental Healthcare services include a variety of interventions, and it is not limited to screening of mental health conditions.

309 Please refer to the WHO Guide for integration of perinatal mental health in maternal and child health services. Geneva: World

310 Health Organization; 2022.

311

312 The primary indicators proposed for perinatal mental health monitoring represent measures aimed at

313 capturing key aspects of maternal psychological wellbeing during pregnancy and up to one year

314 postpartum. These indicators have been carefully selected based on their significance in assessing the  
315 population prevalence, policy and health system plans related to perinatal mental health conditions. They  
316 serve as foundational metrics for monitoring PMH conditions and policies aimed at improving maternal  
317 and newborn health outcomes. Primary indicators include measures in individual and healthcare system  
318 domains, such as the prevalence of antenatal and postnatal depression, rates of screening coverage for  
319 perinatal mental health conditions in the perinatal period, and the proportion of countries with national  
320 policy or plan for perinatal mental health.

321  
322 In addition to the primary indicators, secondary indicators are proposed to guide future efforts and  
323 advancements in perinatal mental health monitoring within a later timeframe. These secondary indicators  
324 represent desired outcomes and areas for improvement that may require additional research, resources,  
325 and policy initiatives to achieve. They encompass measures aimed at enhancing the comprehensiveness,  
326 accuracy, and equity of perinatal mental health monitoring, as well as addressing emerging challenges and  
327 priorities in the field. Secondary indicators include individual, health service delivery and healthcare  
328 system domains, assessing the proportion of women receiving timely and appropriate treatment for  
329 perinatal mental health conditions, the proportion of in-service health care providers trained to provide  
330 mental healthcare services, and the budget expenditure allocated to improve this population issue.  
331 By setting ambitious yet achievable goals for the future, secondary indicators pave the way for continued  
332 progress and innovation in perinatal mental health monitoring and ultimately contribute to better  
333 outcomes for women and newborns worldwide.

## 334 **Discussion**

335 The proposed global PMH indicators has significant implications for global monitoring efforts at global  
336 and national levels. By establishing a standardized set of metrics, countries can systematically track and  
337 compare the prevalence and outcomes of perinatal mental health conditions across regions and over time.  
338 This allows for more accurate assessment of the burden of perinatal mental health disorders and



339 identification of populations at greatest risk. Additionally, standardized indicators facilitate the evaluation  
340 of interventions and policies aimed at improving maternal and newborn health outcomes, enabling  
341 countries to identify effective strategies and allocate resources more efficiently. Moreover, by raising  
342 awareness and prioritizing perinatal mental health on the global agenda, the proposed indicators can  
343 catalyze action and advocacy to address this critical public health issue. The WHO expert committee's  
344 advised to choose indicators to reflect key dimensions of perinatal mental health including prevalence,  
345 screening, policy and health system plans related to perinatal mental health. Priority was given to  
346 indicators that were evidence-based, feasible to measure, and relevant to global monitoring efforts.  
347 Consideration was also given to indicators that could be easily integrated into existing health information  
348 systems and data collection tools as the ones used by hospital and households' surveys to facilitate  
349 implementation and sustainability.

350

## 351 **Challenges in implementing standardized monitoring systems**

352 The need to strengthen coordination and technical leadership to harmonize recommendations for  
353 improved measurement and monitoring of data related to maternal and newborn health has been  
354 highlighted in previous publications [17, 18] and by the WHO MoNITOR Advisory group [22]. Despite  
355 the potential benefits, implementing standardized monitoring systems for maternal and newborn health  
356 and in this case for perinatal mental health specifically, poses several challenges. These include resource  
357 constraints, particularly in low- and middle-income countries, where healthcare infrastructure, funding,  
358 coverage and poor accessibility of PMH services may limit data collection. The integration of PMH into  
359 maternal and newborn health services including validated screening and diagnostic tools would be  
360 essential in the implementation of a monitoring system [23].

361 There are also technical challenges related to data collection, reporting mechanisms, the quality of data,  
362 and interoperability of health information systems which hamper disparities in monitoring efforts between  
363 high-income and low-income countries [24]. The national routine health information system is essential

364 for decision-making, providing regular data on delivery and utilization of services and can be used for  
365 program planning and track progress towards national and subnational targets [25]. In an effort to include  
366 new indicators as the ones proposed in this paper, it is important to consider the use of household and  
367 health facility survey. Household surveys are the primary source of coverage data for LMICs [26],  
368 however not all interventions suggested by this framework can feasibly be tracked using this method.  
369 Linking household and facility surveys would improve the coverage measurement, linking care-seeking  
370 data from household surveys with service provision data from health facility assessments provides a  
371 unique opportunity to produce measures of population coverage that account for service quality [27].  
372 These indicators offer the opportunity to be integrated into the next version of DHS or MICS.  
373 Additionally, cultural and contextual factors may influence the acceptability and uptake of standardized  
374 monitoring protocols, requiring tailored approaches to implementation. Addressing these gaps is essential  
375 for improving the accuracy, comprehensiveness, and equity of perinatal mental health monitoring  
376 worldwide and requires sustained commitment from governments, healthcare providers, and international  
377 partners, as well as investment in capacity building and health system strengthening. Starting with  
378 primary indicators to then expand to secondary indicators would enable each national system to build  
379 capacity and advocate for an improved monitoring system in this area.

380

## 381 **Opportunities for collaboration and capacity building for healthcare**

### 382 **workers**

383 Collaboration and capacity building are essential for the successful implementation of standardized  
384 monitoring systems for perinatal mental health. Multisectoral collaboration involving government  
385 agencies, healthcare providers, academia, civil society organizations, and international partners can  
386 leverage expertise and resources to support monitoring efforts [28]. Capacity building initiatives,  
387 including task sharing and group problem solving therapy can empower health workers and users with the  
388 knowledge and skills needed to respond, screen, diagnose, treat or refer to another specialist, perinatal

389 mental health conditions effectively [29, 30]. This includes training on culturally sensitive approaches to  
390 care, evidence-based interventions, and integration of mental health services into routine antenatal and  
391 postnatal care [23]. By fostering collaboration and investing in capacity building, countries can strengthen  
392 their healthcare systems and improve outcomes for women and newborns.

393

## 394 **Policy recommendations for integrating perinatal mental health**

### 395 **indicators into existing monitoring frameworks**

396 Integrating perinatal mental health indicators into existing monitoring frameworks requires policy  
397 support and coordination at the national and international levels. Policymakers should integrate primary  
398 and secondary PMH indicators into existing health information systems and monitoring frameworks for  
399 maternal and newborn health, ensuring data on maternal psychological wellbeing are routinely collected  
400 and reported. Additionally, policies should prioritize funding for mental health services and workforce  
401 development, ensuring that healthcare providers have the resources and support needed to address  
402 perinatal mental health effectively [31]. Finally, policies should promote collaboration across sectors and  
403 encourage the adoption of evidence-based practices to improve perinatal mental health outcomes. By  
404 incorporating perinatal mental health indicators into existing monitoring frameworks. Countries can  
405 enhance their capacity to address this critical public health issue and achieve better outcomes for women  
406 and newborns.

407 The proposed global indicators for perinatal mental health encompass a range of measures aimed at  
408 capturing key aspects of maternal psychological wellbeing during pregnancy and the postpartum period.  
409 By tracking these indicators, we can better understand the burden of perinatal mental health conditions,  
410 identify gaps in care, and assess the effectiveness of interventions. Ultimately, these indicators have the  
411 potential to improve maternal and newborn health outcomes by informing policy and practice and guiding  
412 resource allocation to areas of greatest need. Additionally, pilot testing of these global PMH indicators to  
413 finalize a PMH monitoring framework in different settings is needed to help identify any practical

414 challenges or limitations, conduct data validation, and allow for further refinement and optimization  
415 before full-scale implementation.

## 416 **Conclusion**

417 Given the significant impact of perinatal mental health on maternal and newborn health outcomes, there is  
418 an urgent need for global stakeholders to prioritize the provision and monitoring of perinatal mental  
419 health care. This includes governments, international organizations, healthcare providers, researchers, and  
420 civil society organizations. Global stakeholders are called upon to pilot the global PMH indicators into  
421 existing monitoring frameworks and programs, allocating resources for mental health services, and  
422 promoting collaboration and capacity building among healthcare workers. By working together to address  
423 perinatal mental health, we can ensure that all women receive the support and care they need to thrive  
424 during pregnancy and the postnatal period, ultimately leading to better outcomes for both women and  
425 newborns.

426

## 427 **Acknowledgements**

428 We acknowledge the kind contribution of each member of the WHO expert group on PMH monitoring  
429 and the WHO MoNITOR advisory group.

430

## 431 **References**

- 432 1. The Lancet. Perinatal depression: a neglected aspect of maternal health. *Lancet*. 2023;402(10403):667
- 433 2. World Organization WH. WHO guide for integration of perinatal mental health in maternal and child health services.  
434 Geneva; 2022.
- 435 3. WHO. ICD 11 Reference Guide. Geneva; 2019
- 436 4. Howard LM, Molyneaux E, Dennis C-L, Rochat T, Stein A, Milgrom J. Non-psychotic mental disorders in the  
437 perinatal period. *The Lancet*. 2014;384(9956):1775-88.
- 438 5. Jones I, Chandra PS, Dazzan P, Howard LM. Bipolar disorder, affective psychosis, and schizophrenia in pregnancy and  
439 the post-partum period. *The Lancet*. 2014;384(9956):1789-99
- 440 6. Manolova G, Waqas A, Chowdhary N, Salisbury TT, Dua T. Integrating perinatal mental healthcare into maternal and  
441 perinatal services in low and middle income countries. *BMJ*. 2023;381:e073343.

- 442  
443  
444  
445  
446  
447  
448  
449  
450  
451  
452  
453  
454  
455  
456  
457  
458  
459  
460  
461  
462  
463  
464  
465  
466  
467  
468  
469  
470  
471  
472  
473  
474  
475  
476  
477  
478  
479  
480  
481  
482  
483  
484  
485  
486  
487  
488  
489  
490  
491  
492  
493  
494  
495  
496  
497  
498  
499  
500  
501  
502
7. World Health Organization. Maternal mental health n.d. [Available from: <https://www.who.int/teams/mental-health-and-substance-use/promotion-prevention/maternal-mental-health>]
  8. Herba CM, Glover V, Ramchandani PG, Rondon MB. Maternal depression and mental health in early childhood: an examination of underlying mechanisms in low-income and middle-income countries. *Lancet Psychiatry*. 2016;3(10):983-92.
  9. Roddy Mitchell A, Gordon H, Lindquist A, Walker SP, Homer CSE, Middleton A, et al. Prevalence of Perinatal Depression in Low- and Middle-Income Countries: A Systematic Review and Meta-analysis. *JAMA Psychiatry*. 2023
  10. Wang Z, Liu J, Shuai H, Cai Z, Fu X, Liu Y, Xiao X, Zhang W, Krabbendam E, Liu S, Liu Z, Li Z, Yang BX. Correction: Mapping global prevalence of depression among postpartum women. *Transl Psychiatry*. 2021 Dec 20;11(1):640. doi: 10.1038/s41398-021-01692-1. Erratum for: *Transl Psychiatry*. 2021 Oct 20;11(1):543. doi: 10.1038/s41398-021-01663-6. PMID: 34930896; PMCID: PMC8688482.
  11. Gelaye B, Rondon MB, Araya R, Williams MA. Epidemiology of maternal depression, risk factors, and child outcomes in low-income and middle-income countries. *Lancet Psychiatry*. 2016;3(10):973-82.
  12. McNab S DS, Gomez P, Bhatti A, Khadka N, Kenyi E. The Silent Burden: Common Perinatal Mental Disorders in Low- and Middle-Income Countries. Washington, DC.: USAID MOMENTUM.; 2021.
  13. Stein A, Pearson RM, Goodman SH, Rapa E, Rahman A, McCallum M, et al. Effects of perinatal mental disorders on the fetus and child. *Lancet*. 2014;384 North American Edition (9956):1800-19.
  14. Molenaar JM, Boesveld IC, Kieft-de Jong JC, Struijs JN. Monitoring the Dutch Solid Start Program: Developing an Indicator Set for Municipalities to Monitor their First Thousand Days-Approach. *International journal of integrated care*. 2022;22(4):8
  15. Centers for Disease Control and Prevention Chronic Disease Indicators U.S. Department of Health and Human Services; 2023 [Available from: <https://www.cdc.gov/cdi/>].
  16. Meneses Navarro S, Serván-Mori E, Heredia-Pi I, Pelcastre B, Nigenda G. Ethnic Disparities in Sexual and Reproductive Health in Mexico After 25 Years of Social Policies. *Sexuality Research and Social Policy*. 2022;19:1-16.
  17. Layton E., Mitchell A.R., Kennedy E., Moran A.C., Palestra F., Chowdhary N., McNab S., Homer C.S.E., Maternal Mental Health Matters: A scoping review of indicators for perinatal mental health, Plos- to be confirmed
  18. McNab SE, Fitzgerald L, Stalls S, Bhatti AM, Doggett E, Ricca J, et al. A Shared Vision for Improving Perinatal Mental Health in Low- and Middle-Income Countries: A Theory of Change and Prioritized Implementation Research Questions. USAID, MOMENTUM; 2022.
  19. Mental health atlas 2020. Geneva: World Health Organization; 2021. Licence: CC BY-NC-SA 3.0 IGO.
  20. WHO recommendations on maternal and newborn care for a positive postnatal experience. Geneva: World Health Organization; 2022. Licence: CC BY-NC-SA 3.0 IGO
  21. WHO recommendations on antenatal care for a positive pregnancy experience. Geneva: World Health Organization; 2016.
  22. Moller AB, Newby H, Hanson C, Morgan A, El Arifeen S, Chou D, Diaz T, Say L, Askew I, Moran AC. Measures matter: A scoping review of maternal and newborn indicators. *PLoS One*. 2018 Oct 9;13(10):e0204763. doi: 10.1371/journal.pone.0204763. PMID: 30300361; PMCID: PMC6177145.
  23. Manolova G, Waqas A, Chowdhary N, Salisbury TT, Dua T. Integrating perinatal mental healthcare into maternal and perinatal services in low and middle income countries. *BMJ*. 2023 May 23;381:e073343. doi: 10.1136/bmj-2022-073343. PMID: 37220917; PMCID: PMC10203867.
  24. Kabue MM, Palestra F, Katwan E, Moran AC. Availability of priority maternal and newborn health indicators: Cross-sectional analysis of pregnancy, childbirth and postnatal care registers from 21 countries. *PLoS Glob Public Health*. 2023 Jan 5;3(1):e0000739. doi: 10.1371/journal.pgph.0000739. PMID: 36962773; PMCID: PMC10021477.
  25. Mallick L, Temsah G, Namaste S, Dontamsetti T, and Wang W. *Using Health Management Information Systems Data to Contextualize Survey-based Estimates of Fertility, Mortality, and Wasting: DHS Occasional Paper; No. 12*. ICF; Rockville, Maryland, USA: 2020. Available from: <https://dhsprogram.com/pubs/pdf/OP12/OP12.pdf>. [Google Scholar]
  26. Munos MK, Stanton CK, Bryce J, Core Group for Improving Coverage Measurement for MNCH Improving coverage measurement for reproductive, maternal, neonatal and child health: gaps and opportunities. *J Glob Health*. 2017;7:010801. doi: 10.7189/jogh.07.010801
  27. Kanyangarara M, Chou VB, Creanga AA, Walker N. Linking household and health facility surveys to assess obstetric service availability, readiness and coverage: evidence from 17 low- and middle-income countries. *J Glob Health*. 2018 Jun;8(1):010603. doi: 10.7189/jogh.08.010603. PMID: 29862026; PMCID: PMC5963736.
  28. Ng'oma M, Bitew T, Kaiyo-Utete M, Hanlon C, Honikman S, Stewart RC. Perinatal mental health around the world: priorities for research and service development in Africa. *BJPsych International*. 2020;17(3):56-59. doi:10.1192/bji.2020.16
  29. J E M Nakku, O Nalwadda, E Garman, S Honikman, C Hanlon, F Kigozi, C Lund. Group problem solving therapy for perinatal depression in primary health care settings in rural Uganda: an intervention cohort study (2021), *BMC Pregnancy and Childbirth* 21:584. DOI: 10.1186/s12884-021-04043-6
  30. S Boisits, Z Abrahams, M Schneider, S Honikman, D Kaminer and C Lund. Developing a task-sharing psychological intervention to treat mild to moderate symptoms of perinatal depression and anxiety in South Africa: a mixed-method formative study (2021), *Int J Ment Health Syst* 15, 23. DOI: 10.1186/s13033-021-00443-5

- 503  
504  
505  
506  
507  
508  
509  
510  
511
31. Schiller CE, Cohen MJ, O'Hara MW. Perinatal mental health around the world: priorities for research and service development in the USA. *BJPsych Int.* 2020 Nov;17(4):87-91. doi: 10.1192/bji.2020.15. PMID: 33196694; PMCID: PMC7609989.
